# Supplementary material for: Variational assimilation of IASI SO 2 plume height and total column retrievals in the 2010 eruption of Eyjafjallajökull using the SILAM v5.3 chemistry transport model
Source: Copernicus journal article supplement (doi:10.5194/gmd-10-1985-2017), 2017-05-22
Supplement: Supplementary file 1 [file gmd-10-1985-2017-supplement.pdf]

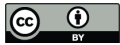

*Supplement of*

**Variational assimilation of IASI SO<sub>2</sub> plume height and total column retrievals in the 2010 eruption of Eyjafjallajökull using the SILAM v5.3 chemistry transport model**

**Julius Vira et al.**

*Correspondence to:* Julius Vira ([julius.vira@fmi.fi](mailto:julius.vira@fmi.fi))

The copyright of individual parts of the supplement might differ from the CC-BY 3.0 licence.

## Contents

|                                                                         |    |
|-------------------------------------------------------------------------|----|
| 1. Comparison of simulated and IASI total columns, 1-20 May, 2010 ..... | 2  |
| 2. Comparison of simulated and IASI plume heights, 1-20 May 2010 .....  | 8  |
| 3. L-curves for the inversions for Eyjafjallajökull.....                | 13 |

## 1. Comparison of simulated and IASI total columns, 1-20 May, 2010

All figures show column density in DU. Further details are given with Fig. 9 in the main manuscript.

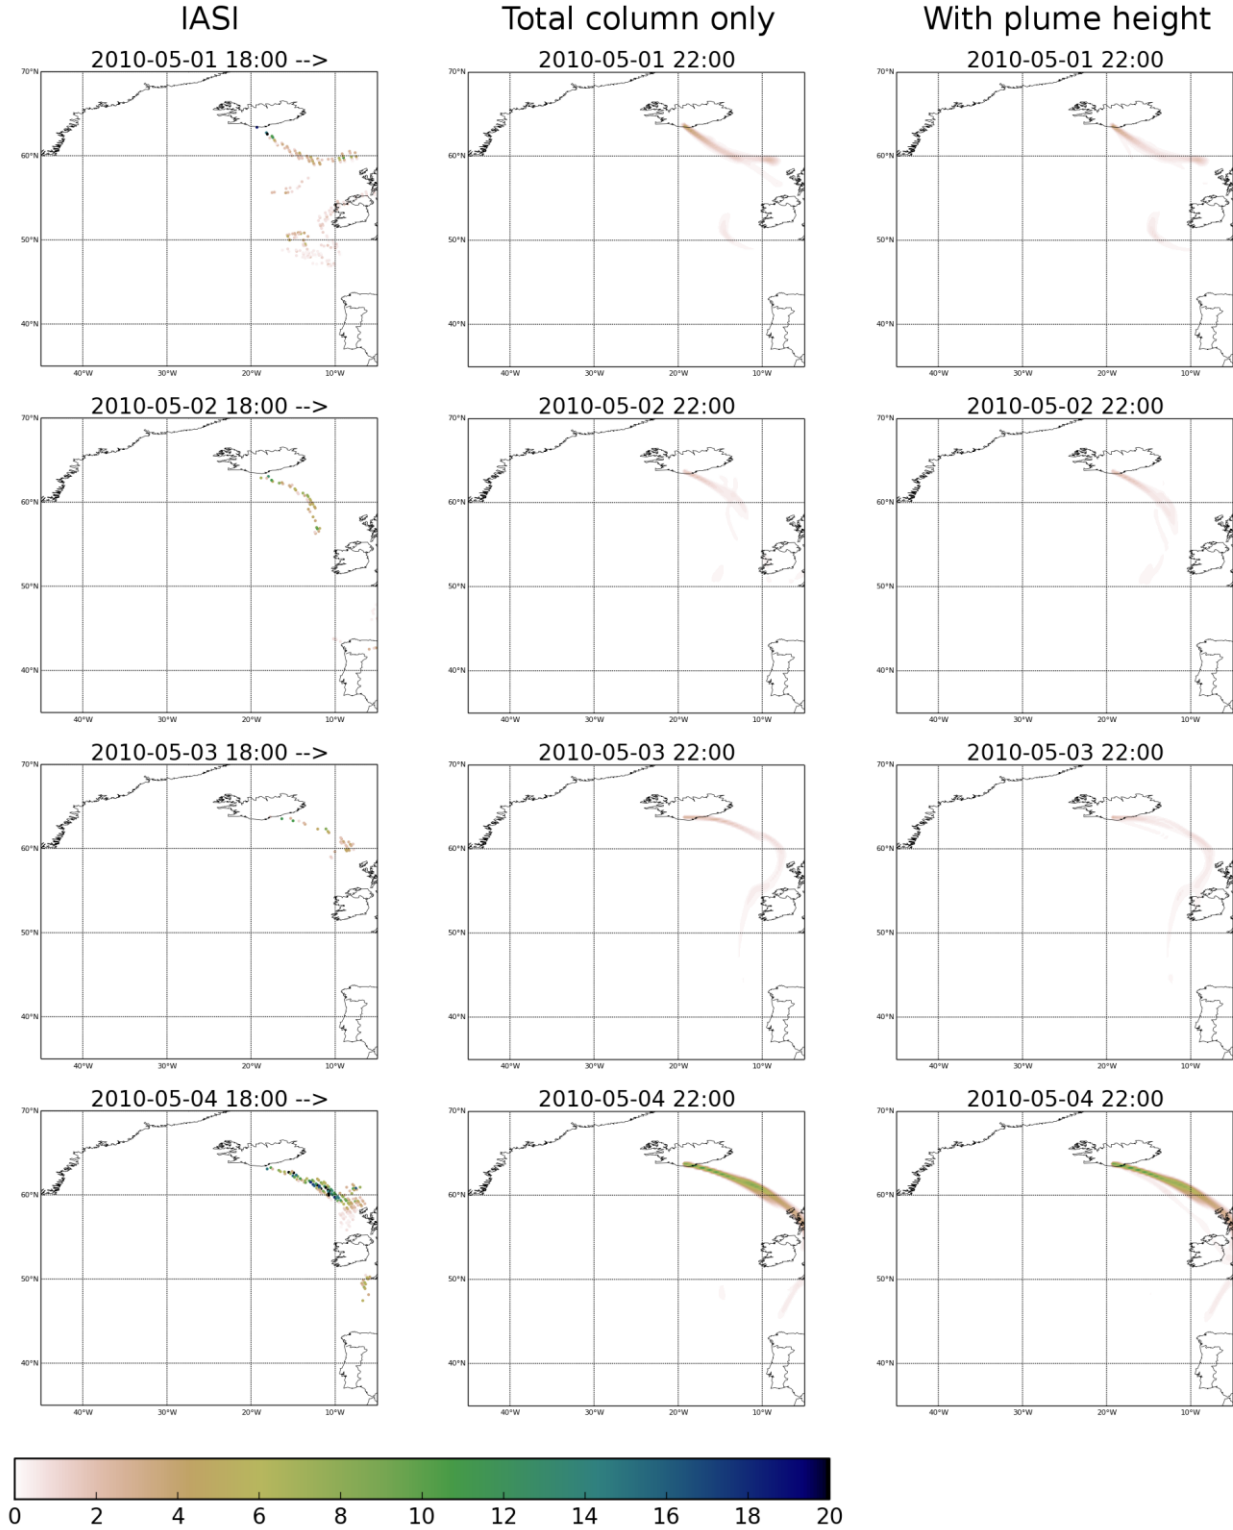

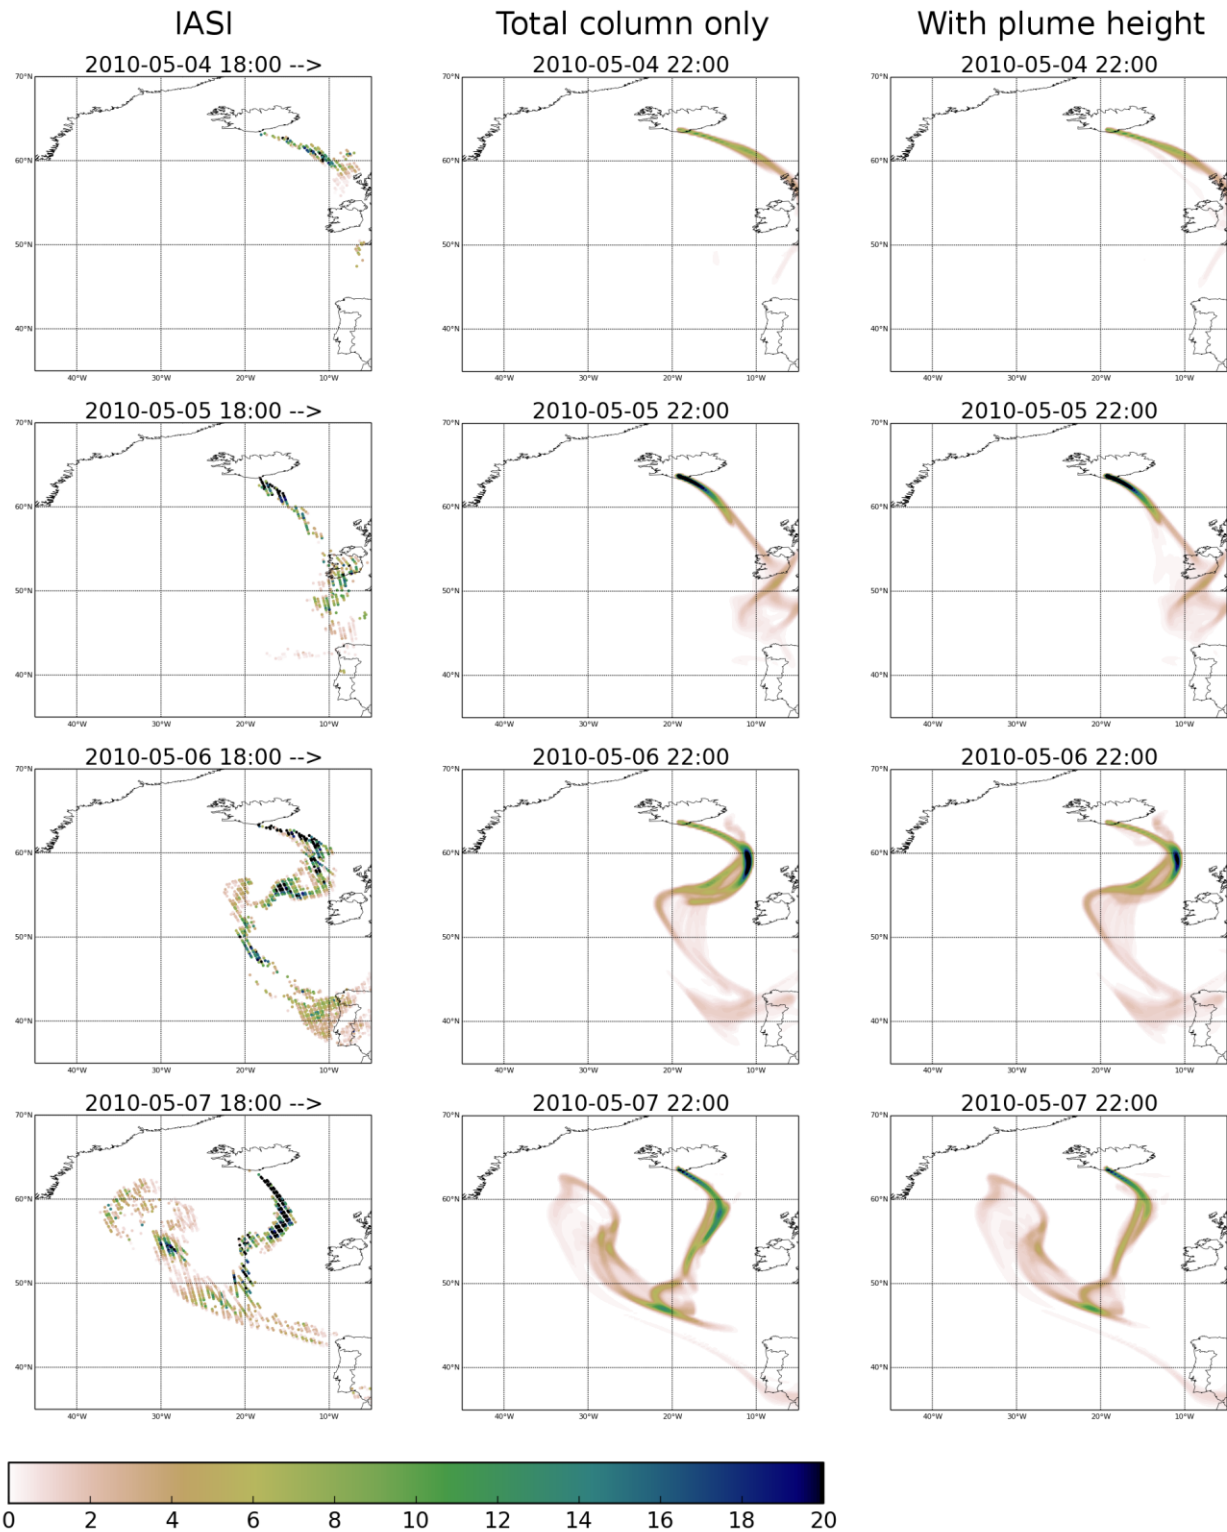

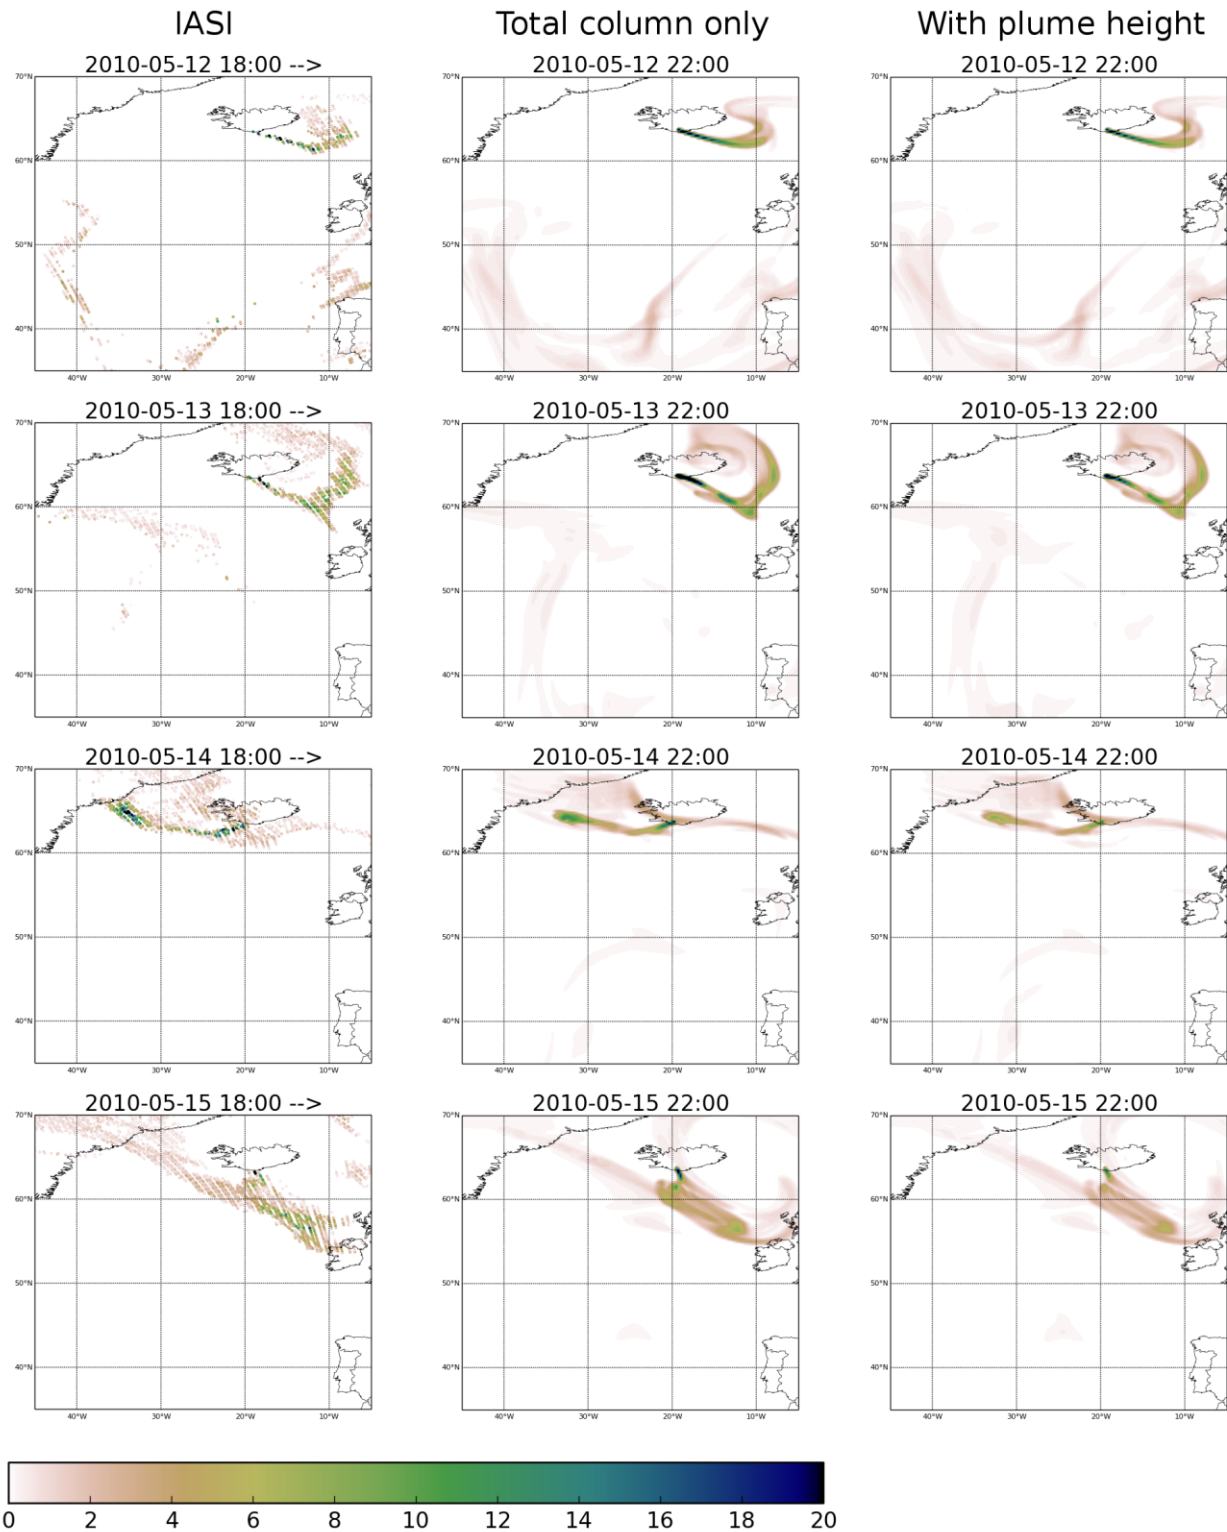

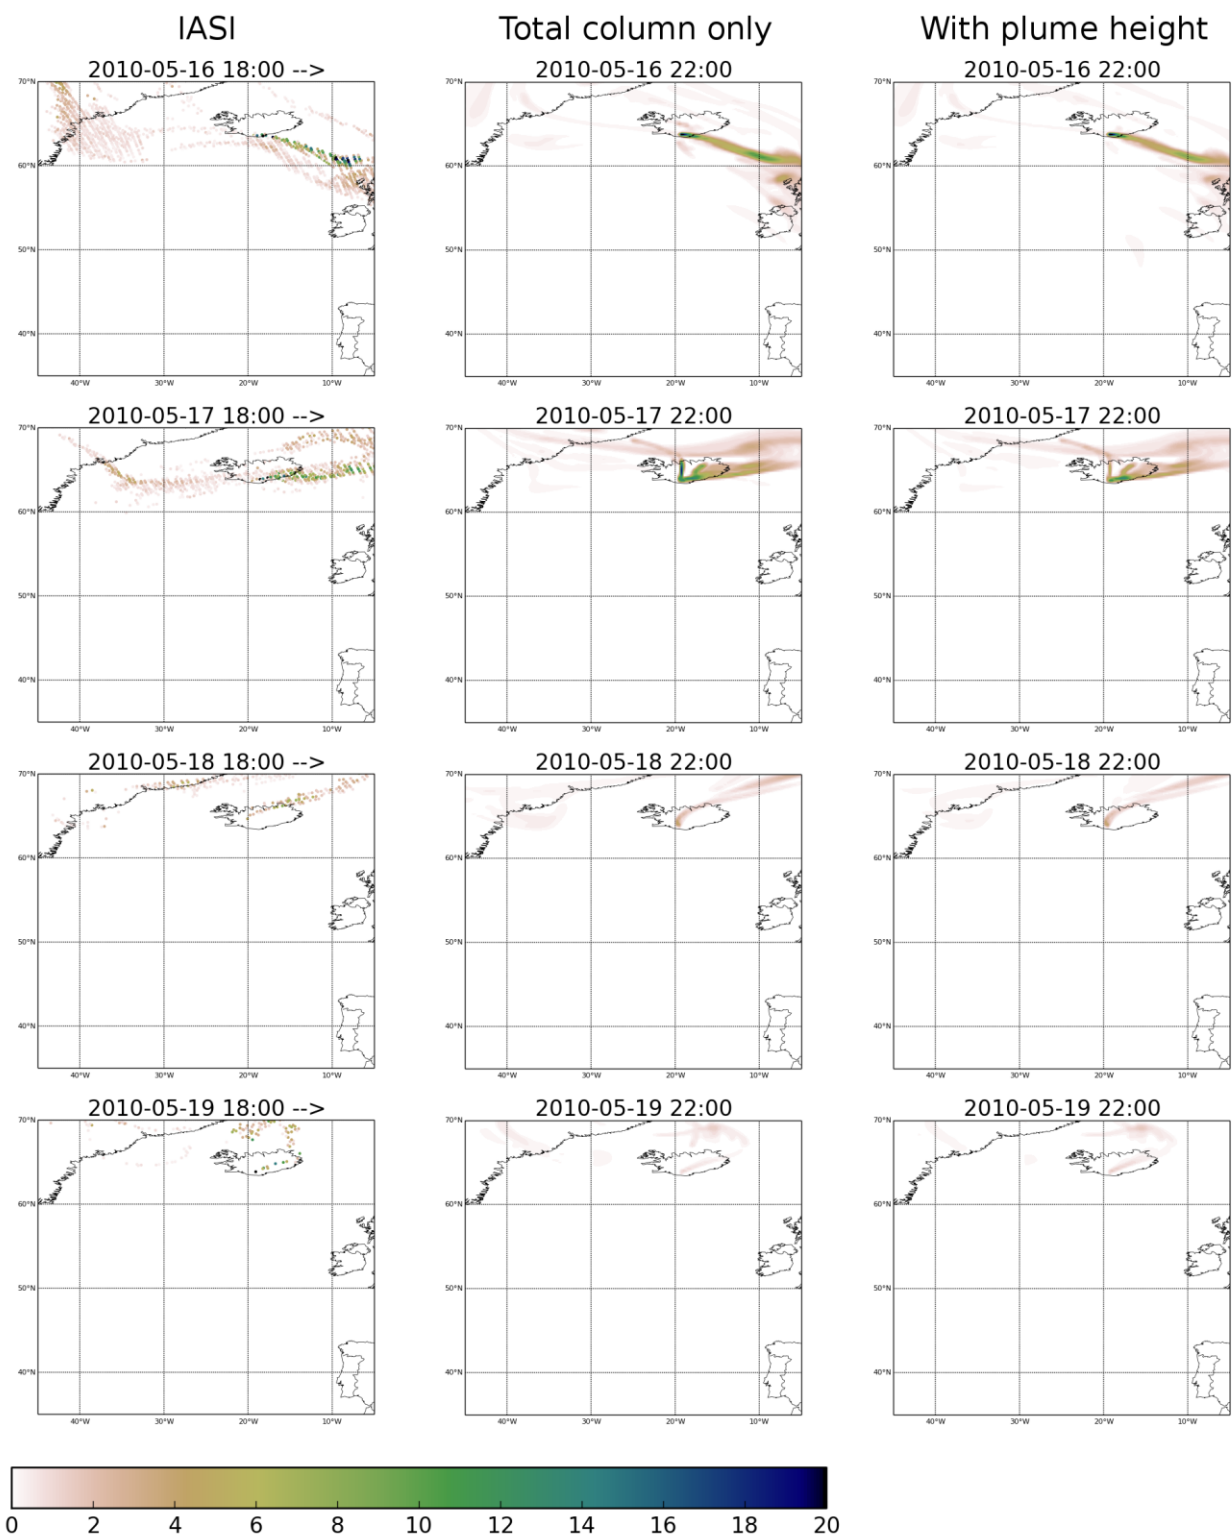

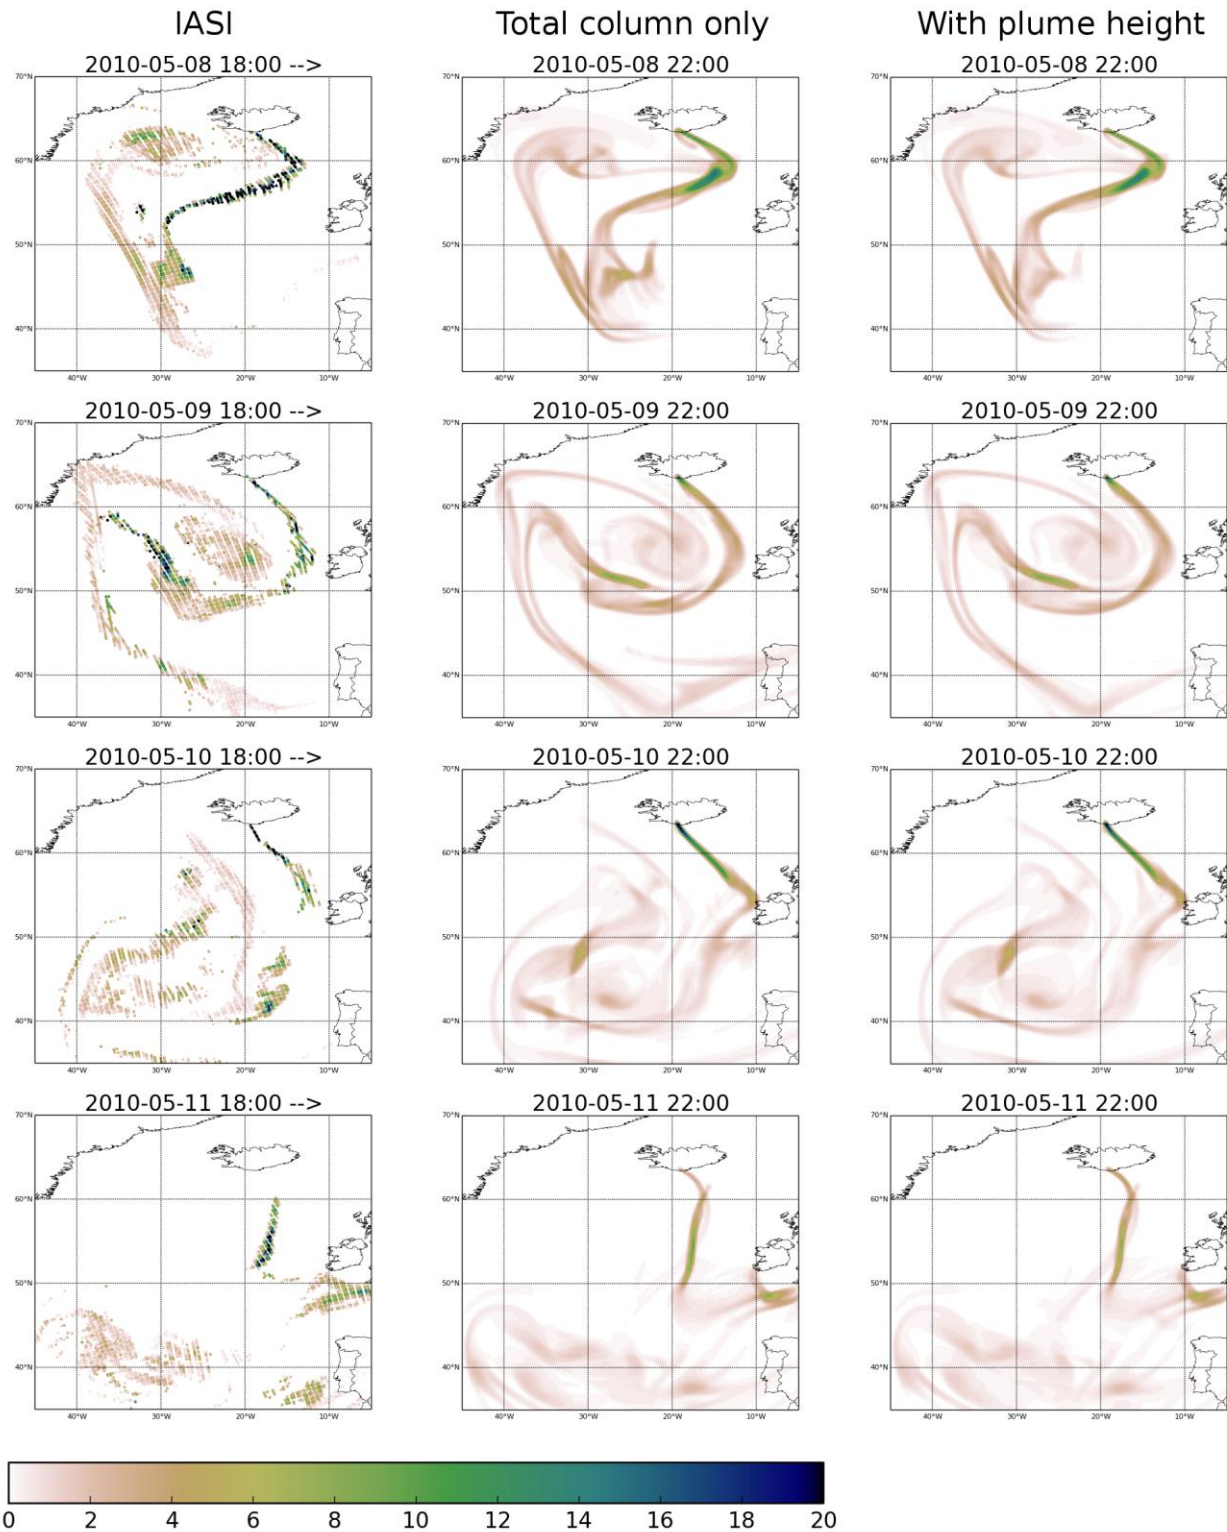

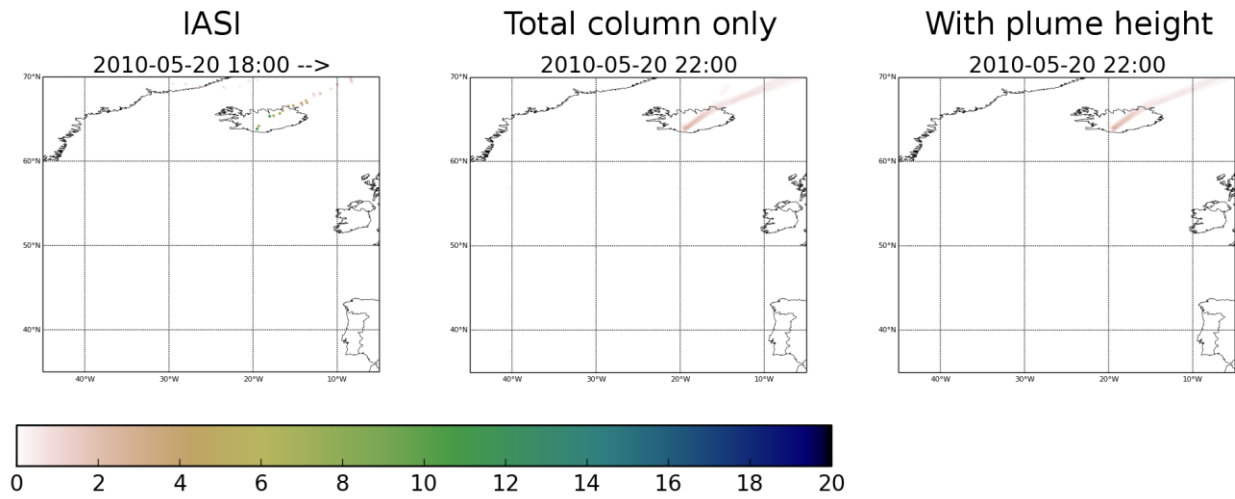

## 2. Comparison of simulated and IASI plume heights, 1-20 May 2010

Plume heights are given in km. Further details are given in Fig. 10 of the main manuscript.

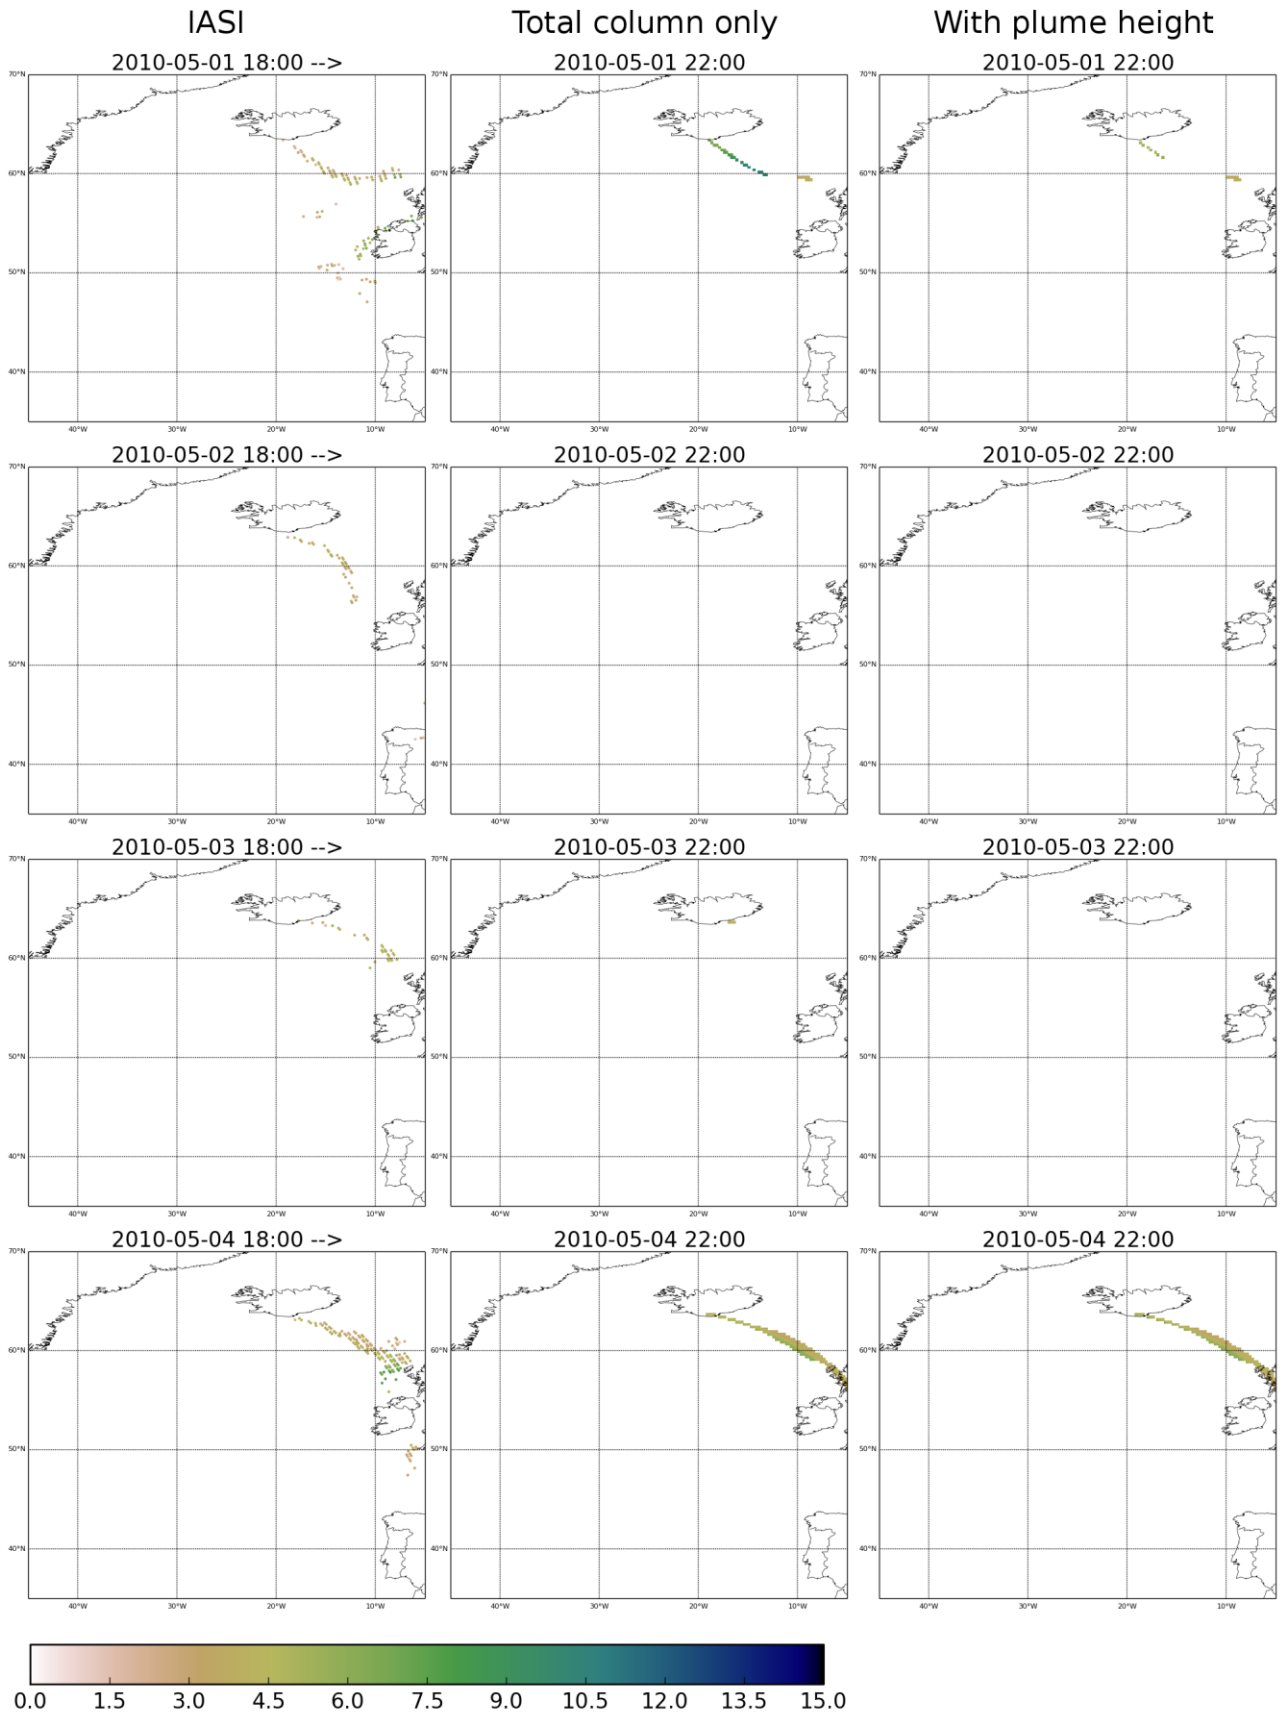

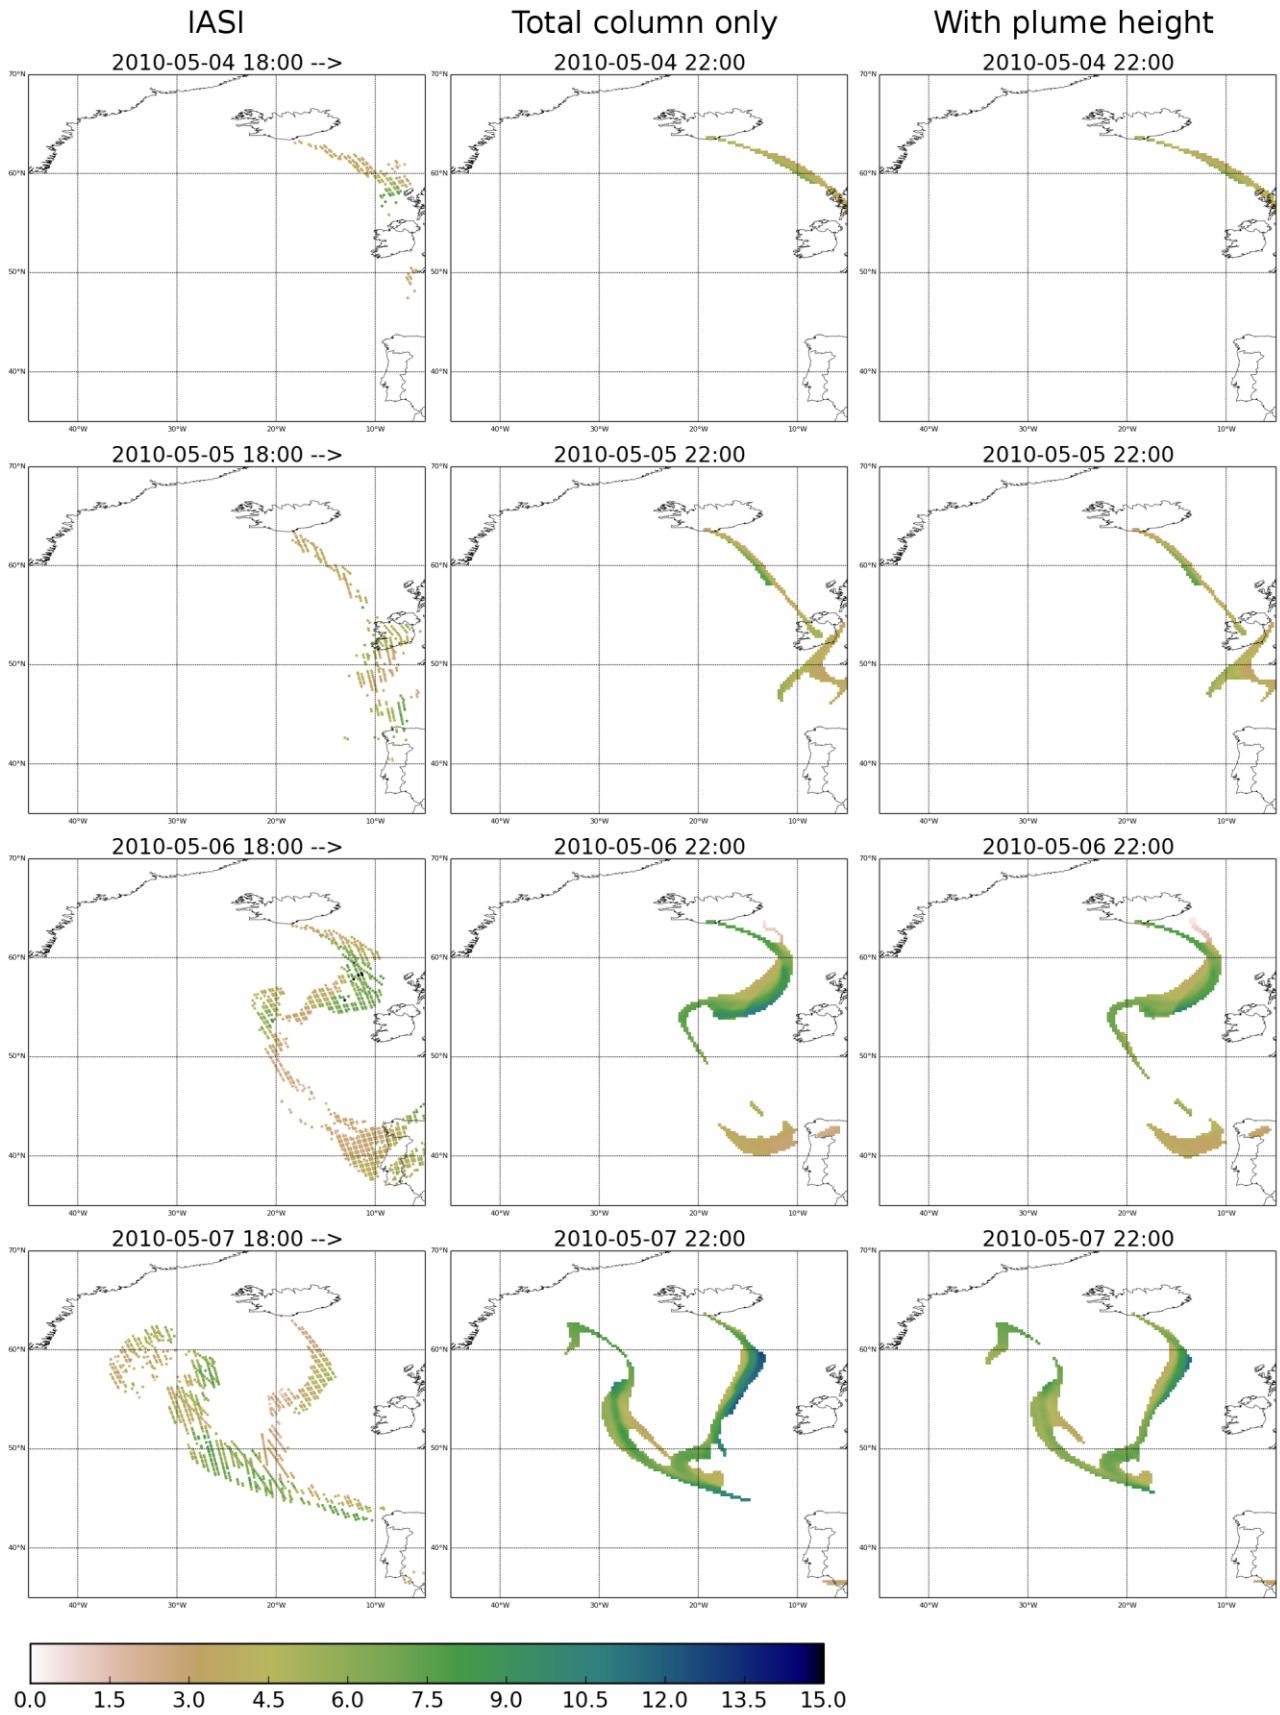

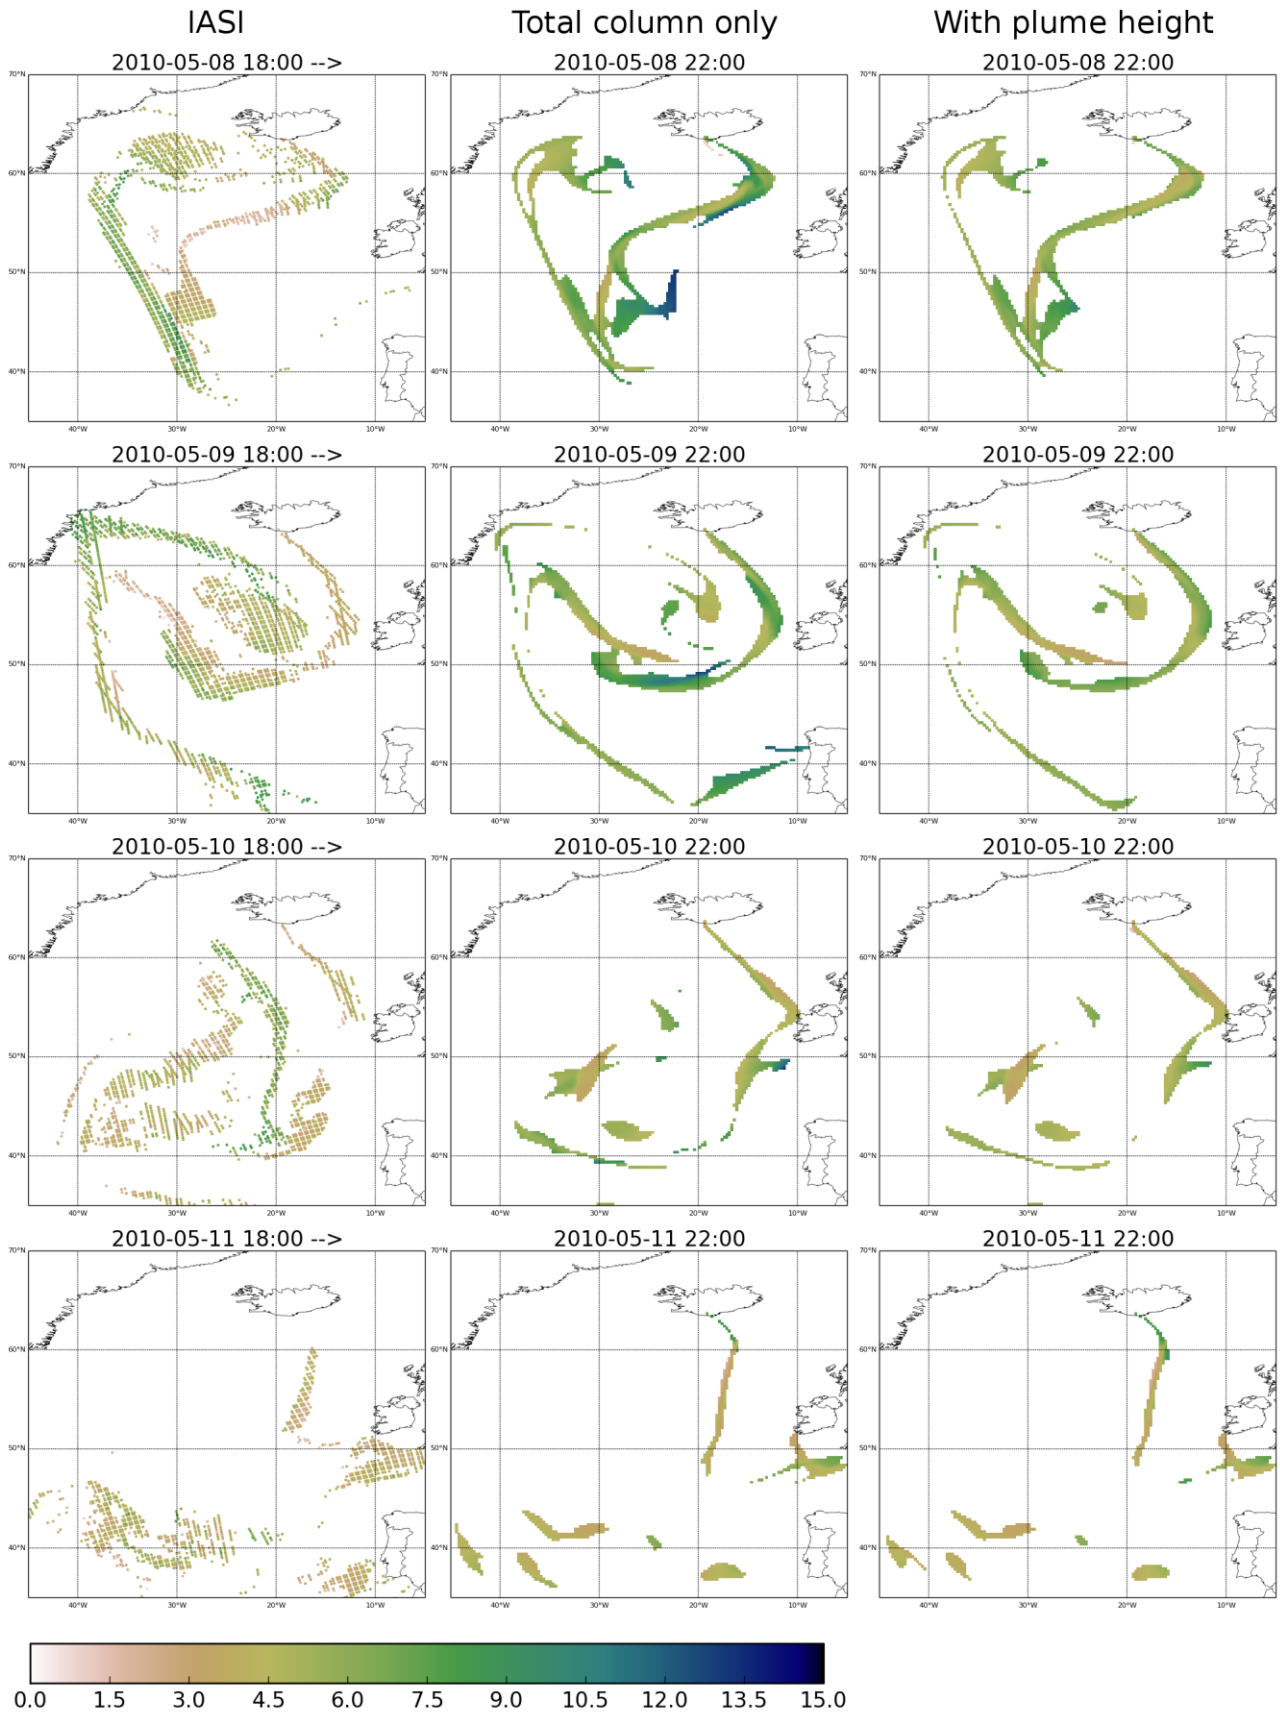

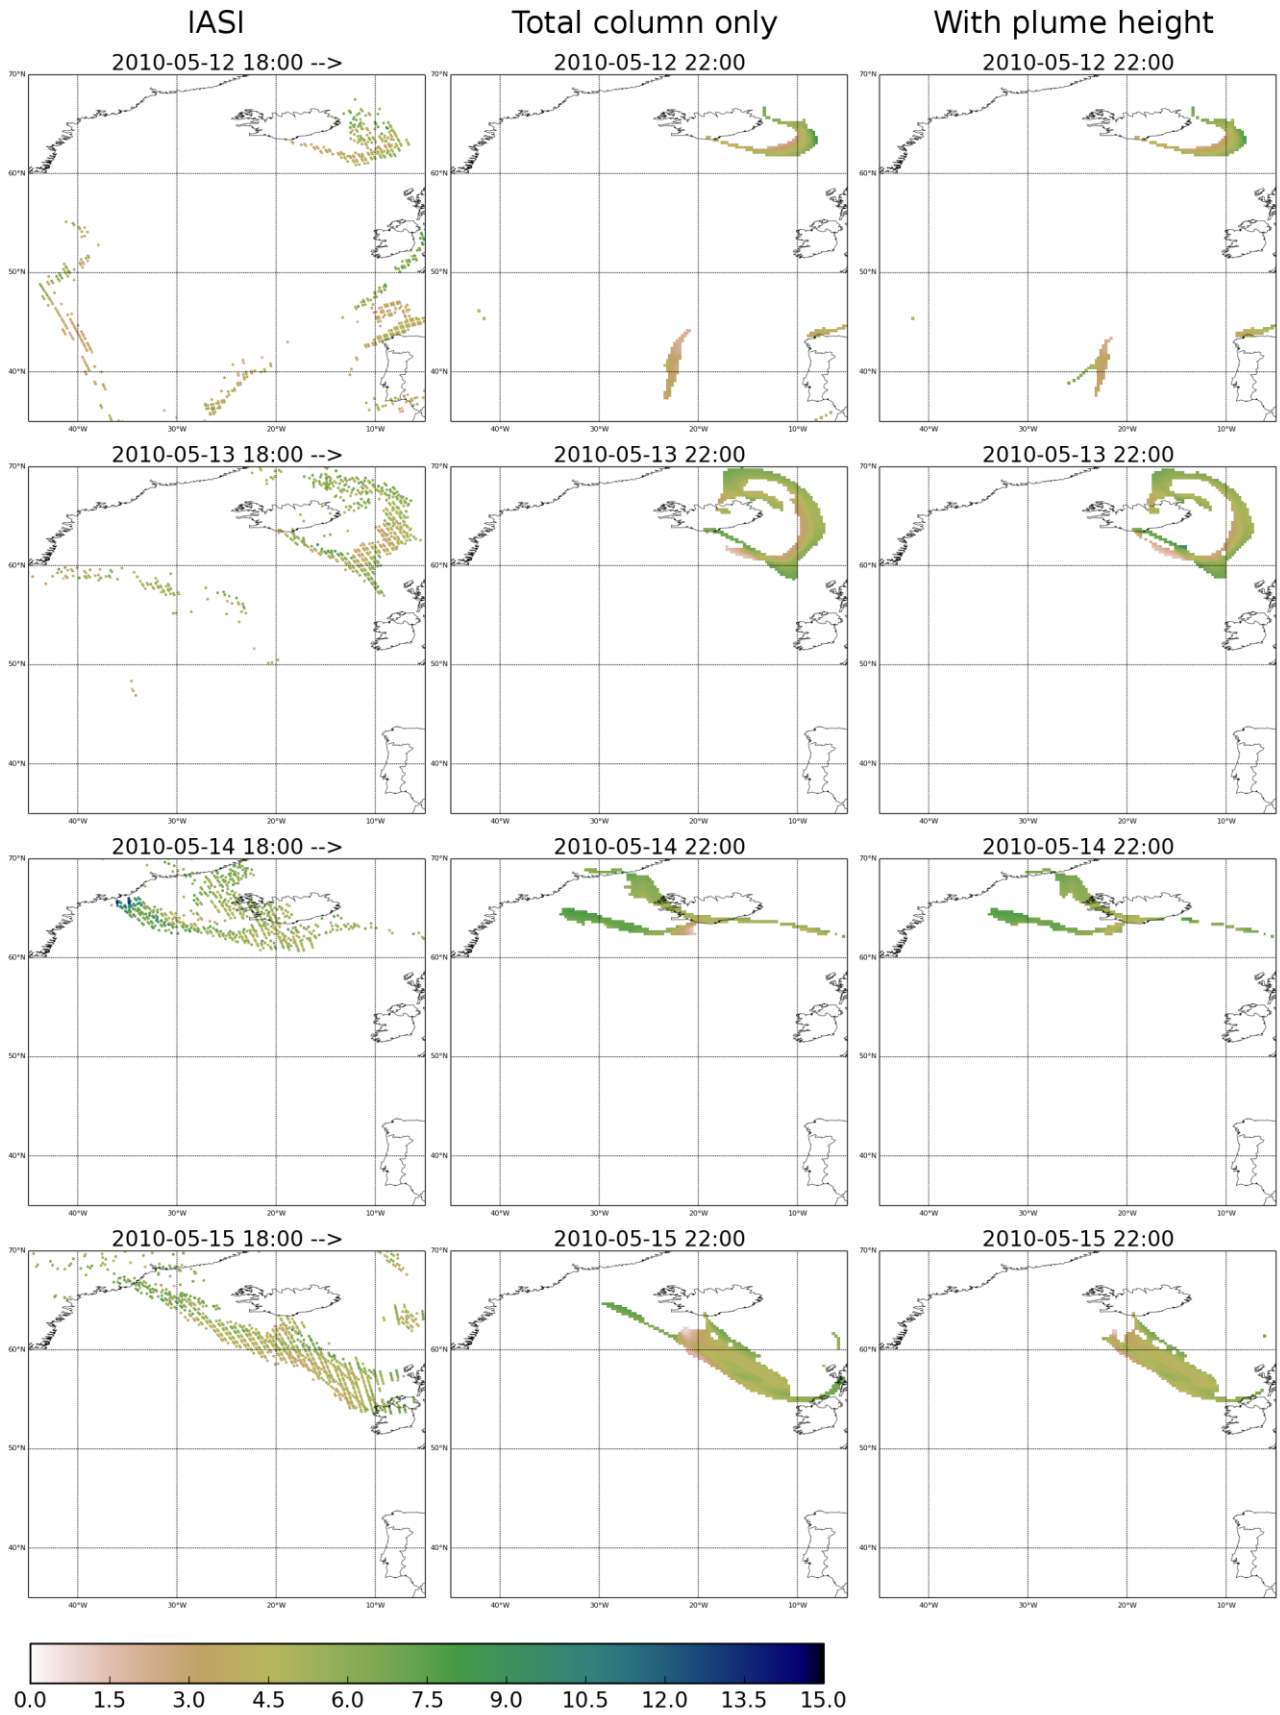

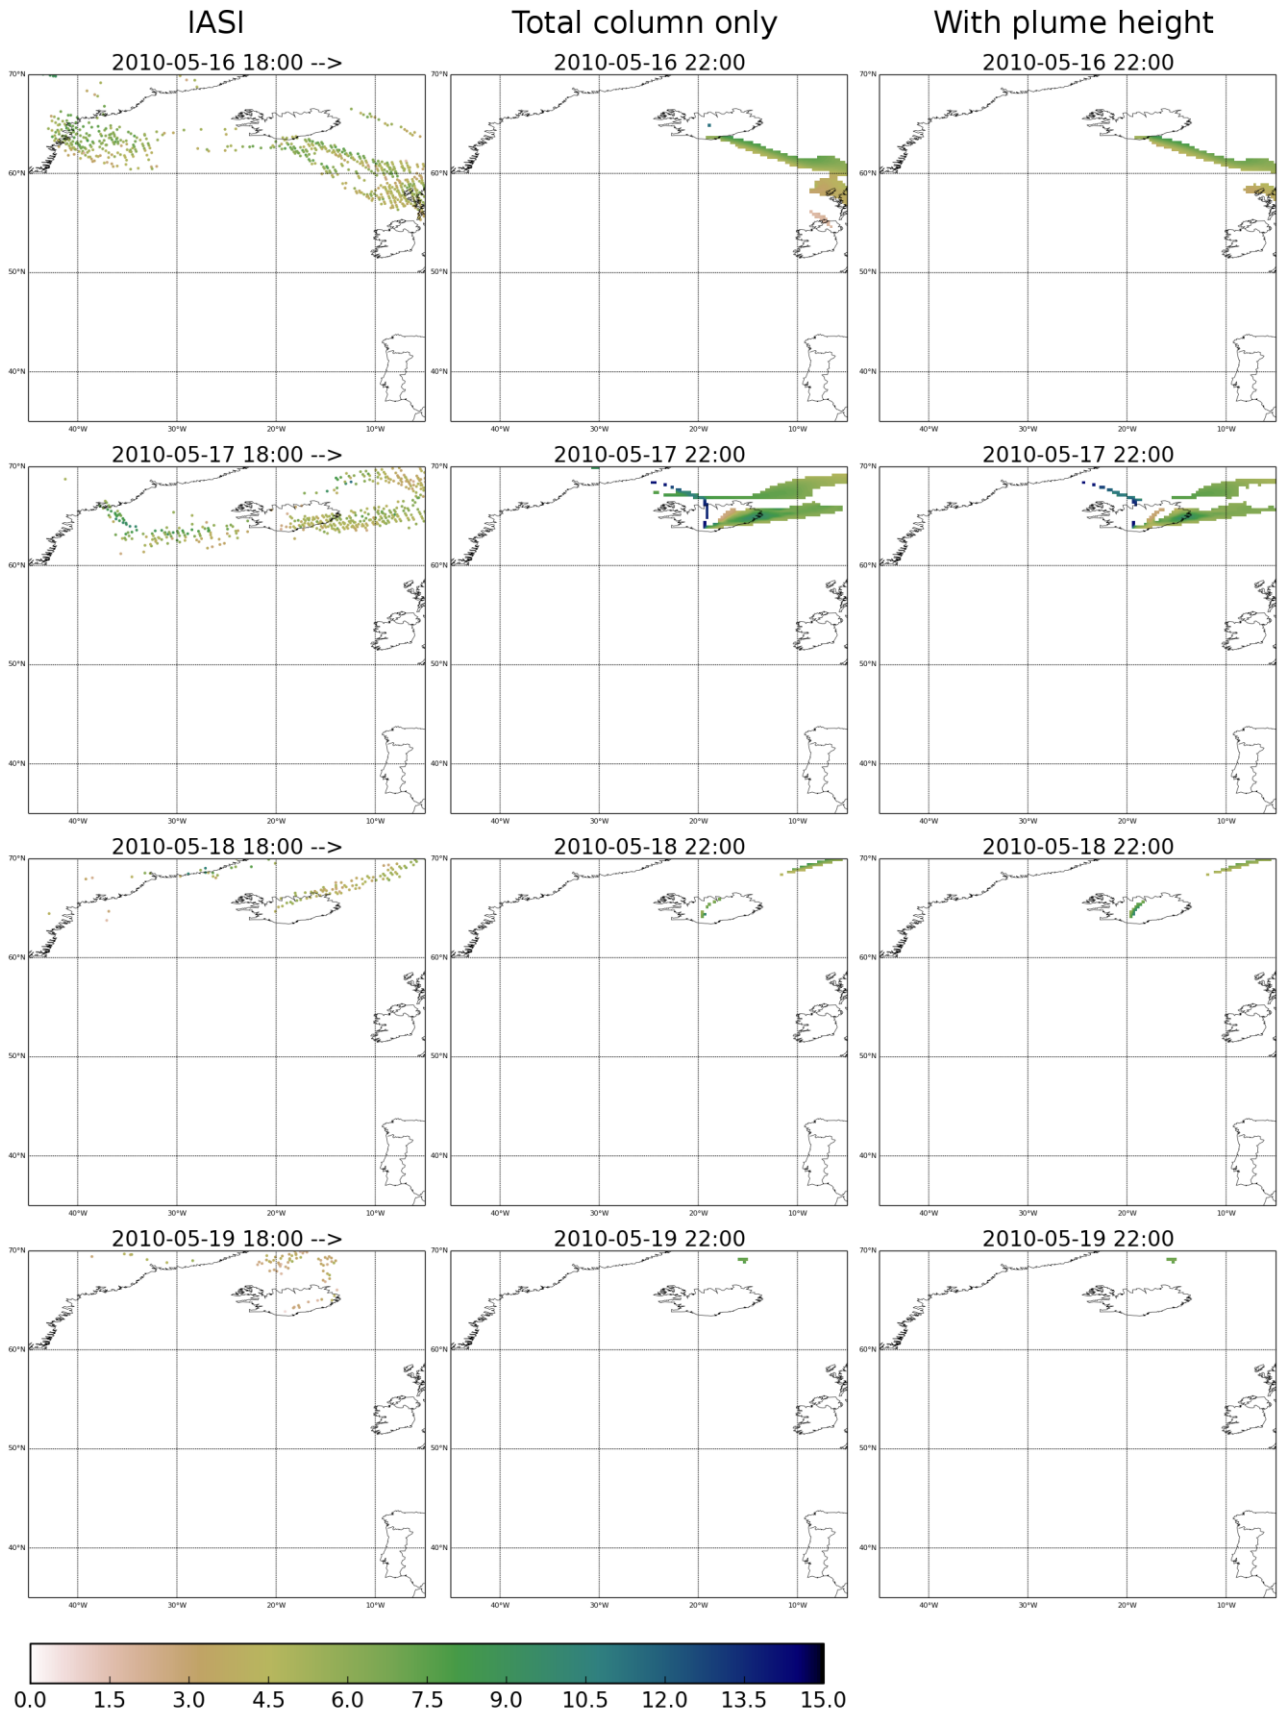

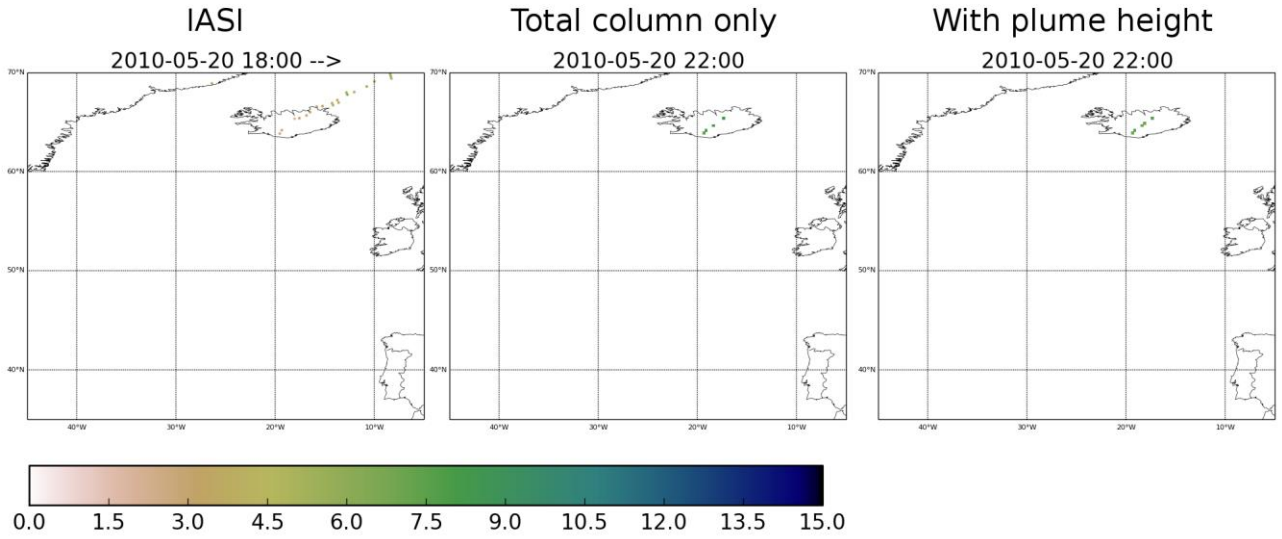

### 3. L-curves for the inversions for Eyjafjallajökull

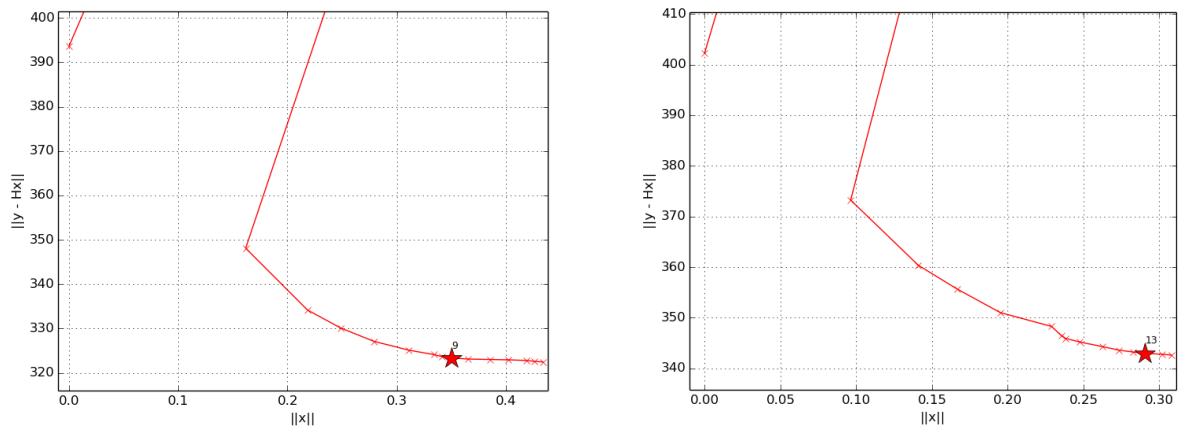

Figure 1. The L-curves (see Section 3.4 in the main manuscript) for the inversion for Eyjafjallajökull, left with assimilation of total columns only, right with assimilation of total column and plume height retrievals. The second iterate has a large discrepancy due to the optimisation algorithm taking a first step normalised with  $\|x\| = 1$ .
